# Supplementary material for: Understanding nanodomain morphology formation in dip-coated PS-b-PEO thin films
Source: Royal Society of Chemistry journal article supplement (doi:10.1039/d1na00263e), 2021-01-01
Supplement: d1na00263e1.pdf [file d1na00263e1.pdf]

## <Supporting Information>

# Understanding the Nanodomain Morphology Formation in Dip-Coated PS-*b*-PEO Thin Films

Hoang M. Nguyen<sup>a†</sup>, Ariane V. Mader<sup>a†</sup>, Swarnalok De<sup>a</sup>, Jaana Vapaavuori<sup>a\*</sup>

---

<sup>a</sup> Department of Chemistry and Materials Science, Aalto University, Espoo 02150, Finland

<sup>†</sup> These authors contributed equally

<sup>\*</sup> Corresponding author

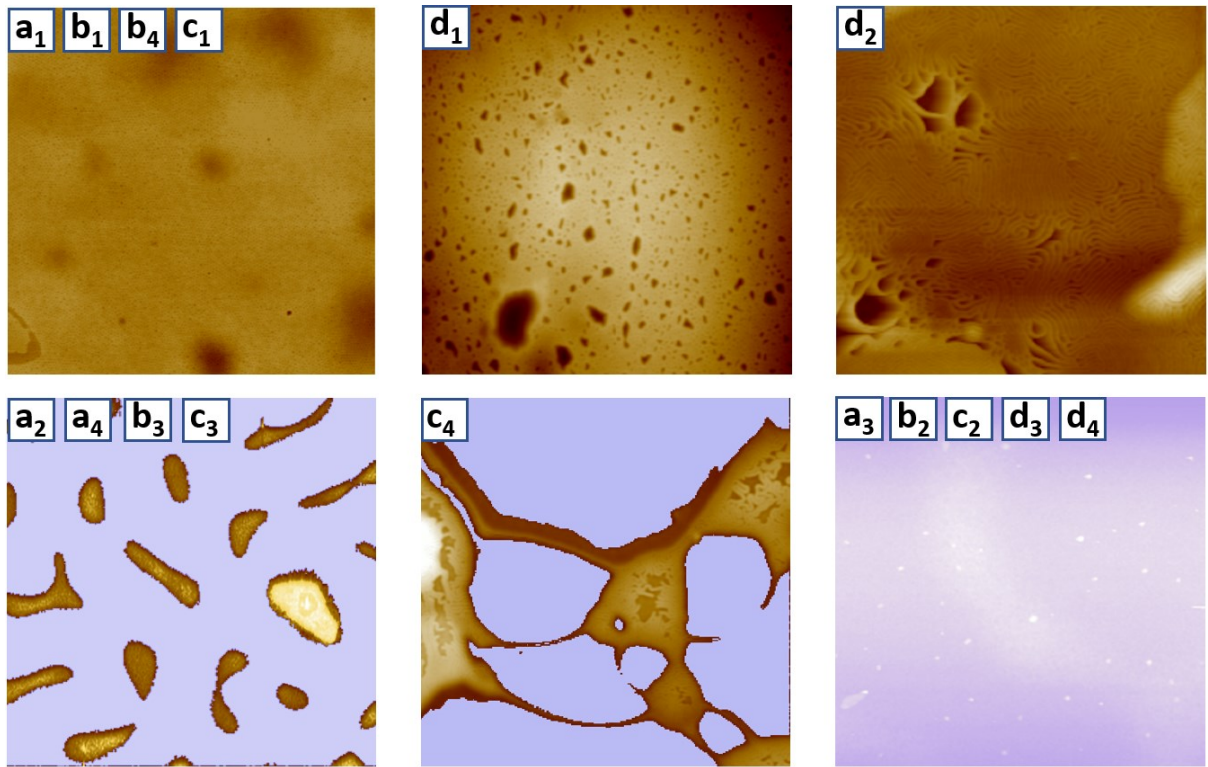

**Figure S1.** Representative AFM height images in larger scan size ( $5 \times 5 \mu\text{m}$ ) of the BCP films shown in Figure 1: ( $a_1, b_1, b_4, c_1$ ) dot patterns spanning the whole film, ( $d_1$ ) mixtures of dot and stripe patterns spanning the whole film, ( $d_2$ ) stripes patterns spanning the whole film, ( $a_2, a_4, b_3, c_3$ ) islands containing dot patterns, ( $c_4$ ) islands containing stripe patterns, ( $a_3, b_2, c_2, d_3, d_4$ ) featureless film. The light purple color corresponds to the featureless region.

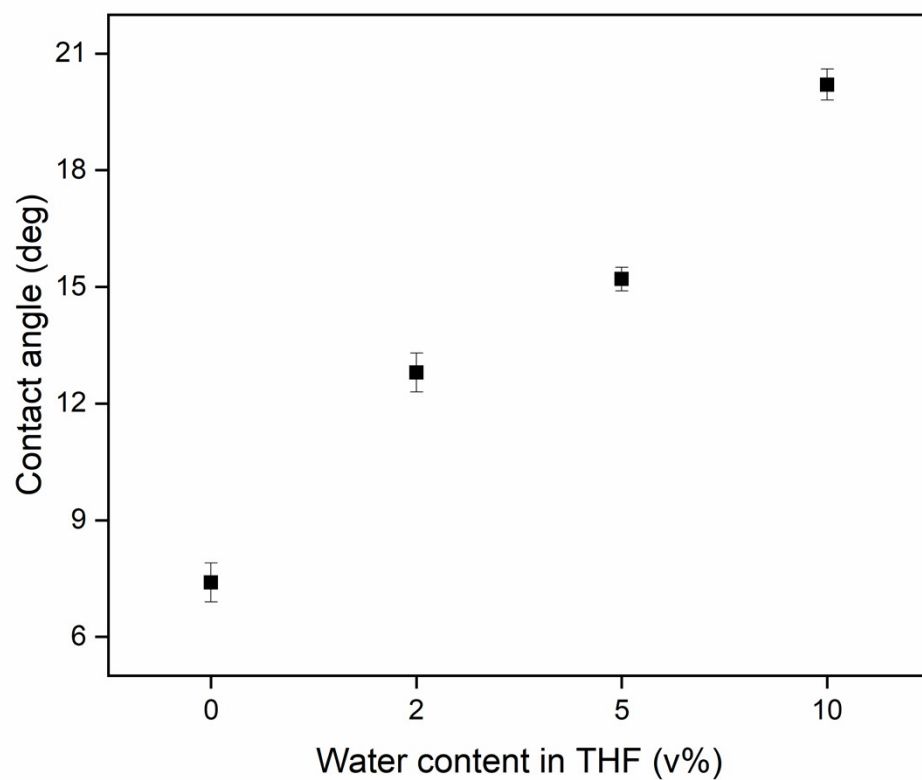

**Figure S2.** The static contact angle of sessile drops of BCP solutions containing different amounts of water on cleaned Si substrates.

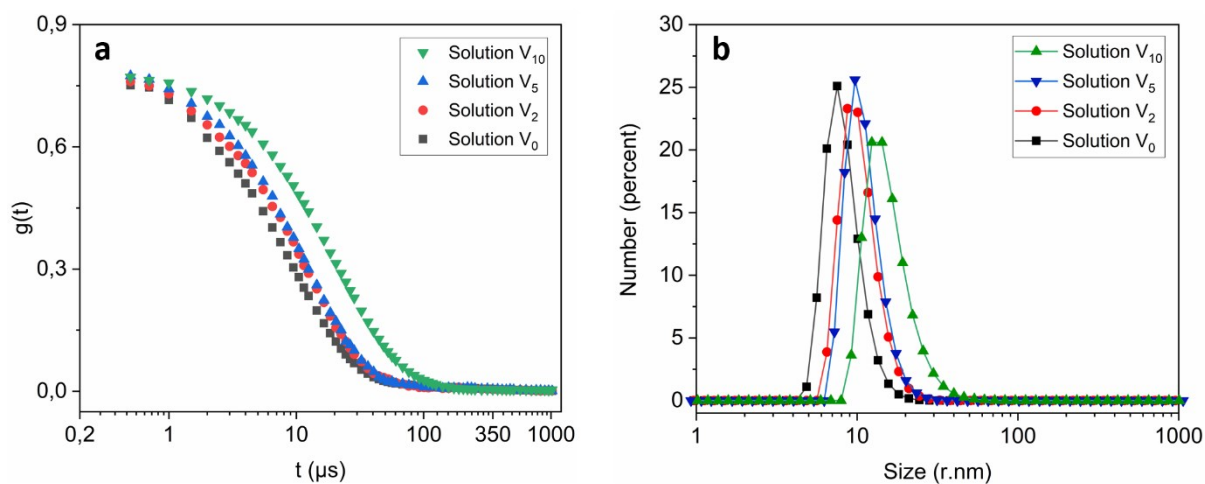

**Figure S3.** DLS data of the PS-*b*-PEO structure measured from different solutions. (a) Autocorrelation functions of PS-*b*-PEO solutions with different water contents in THF: 0% (black square), 2% (red circle), 5% (blue upward triangle) and 10% (green downward triangle). (b) Size distribution by number of PS-*b*-PEO solutions with different water contents in THF: 0% (black line), 2% (red line), 5% (blue line) and 10% (green line). The continuous lines connecting the data points are for the sole purpose of visual guidance.
